# Supplementary material for: Trends in Cardiovascular Mortality Among a Cohort of Children and Young Adults Starting Dialysis in 1995 to 2015
Source: PubMed Central journal article supplement (PMC7489869; doi:10.1001/jamanetworkopen.2020.16197), 2020-09-09

## Supplementary Online Content

Ku E, McCulloch CE, Ahearn P, Grimes BA, Mitsnefes MM. Trends in Cardiovascular Mortality Among a Cohort of Children and Young Adults Starting Dialysis in 1995 to 2015. *JAMA Netw Open*. 2020;3(9):e2016197. doi:10.1001/jamanetworkopen.2020.16197

**eTable 1.** Differences in Characteristics Over Time of Patients Starting Dialysis by Calendar Period (1995-2005 vs. 2006-2015)

**eFigure 1.** Cohort Derivation

**eFigure 2.** Trends in Rates of Death by Year

This supplementary material has been provided by the authors to give readers additional information about their work.

**eTable 1:** Differences in characteristics over time of patients starting dialysis by calendar period (1995-2005 vs. 2006-2015)

| <b>Descriptive Characteristics</b>            | <b>1995-1999</b><br>N=18519 | <b>2000-2004</b><br>N=18841 | <b>2005-2009</b><br>N=19961 | <b>2010-2015</b><br>N=22868 |
|-----------------------------------------------|-----------------------------|-----------------------------|-----------------------------|-----------------------------|
| Mean age (yrs) ± SD at dialysis initiation    | 22.6 ± 7.0                  | 22.2 ± 7.3                  | 22.4 ± 7.2                  | 22.6 ± 7.3                  |
| Median age (yrs) [IQR] at dialysis initiation | 25 (19-28)                  | 24 (19-28)                  | 24 (19-28)                  | 25 (20-28)                  |
| Female (%)                                    | 45.1                        | 45.1                        | 44.9                        | 45.7                        |
| Race/ethnicity (%)                            |                             |                             |                             |                             |
| NHW                                           | 39.2                        | 35.5                        | 36.4                        | 36.4                        |
| Black                                         | 39.6                        | 37.0                        | 36.0                        | 35.0                        |
| Asian                                         | 4.0                         | 4.6                         | 4.8                         | 5.5                         |
| Hispanic white                                | 14.9                        | 20.1                        | 20.8                        | 21.1                        |
| Other                                         | 2.3                         | 2.8                         | 2.0                         | 2.0                         |
| Median income (\$) [IQR]                      | 44460<br>[35213-57708]      | 45045<br>[35780-58244]      | 45881<br>[36471-58671]      | 45751<br>[36382-58487]      |
| Attributed Cause of ESKD (%)                  |                             |                             |                             |                             |
| GN                                            | 40.1                        | 39.8                        | 36.9                        | 33.8                        |
| Cystic/urologic                               | 5.4                         | 4.8                         | 4.3                         | 4.2                         |
| Hypertension                                  | 14.9                        | 15.2                        | 16.2                        | 18.5                        |
| Diabetes                                      | 15.4                        | 14.1                        | 14.4                        | 15.5                        |
| Other                                         | 24.2                        | 26.0                        | 28.2                        | 28.0                        |
| Co-morbidities at ESKD onset (%)              |                             |                             |                             |                             |
| CAD                                           | 1.2                         | 1.3                         | 1.1                         | 0.9                         |
| CHF                                           | 6.7                         | 7.1                         | 6.7                         | 6.2                         |
| Stroke                                        | 1.2                         | 1.1                         | 1.4                         | 1.4                         |
| Hypertension                                  | 59.8                        | 65.2                        | 70                          | 72.1                        |
| Diabetes                                      | 17.3                        | 16.7                        | 17.8                        | 19.3                        |

GN = glomerulonephritis; IQR = interquartile range; SD = standard deviation

**eFigure 1.** Cohort Derivation.

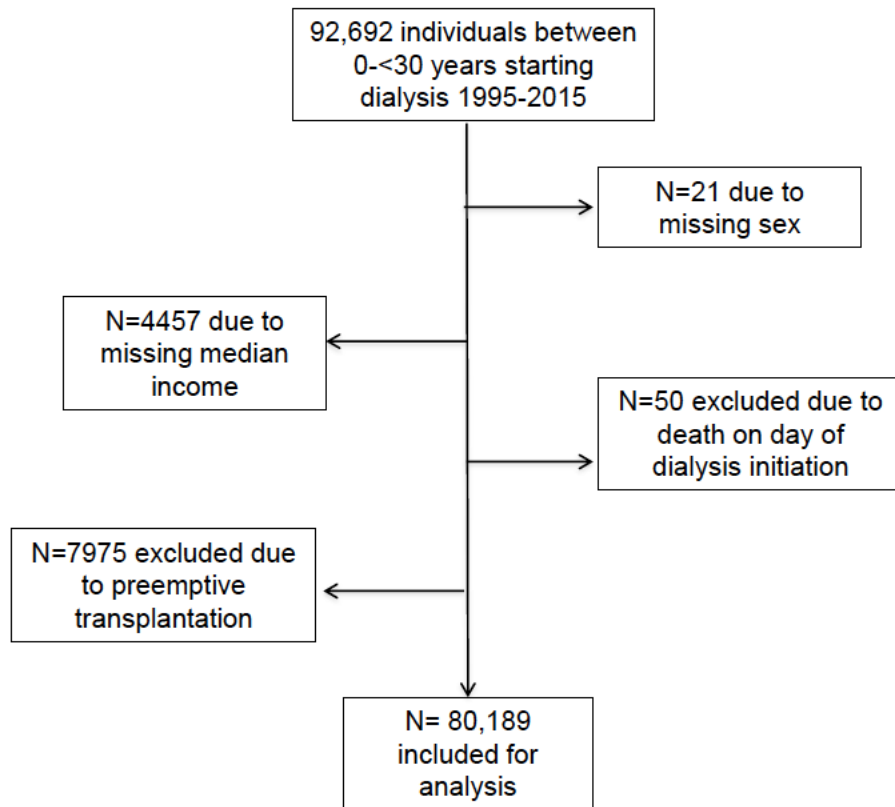

eFigure 2. Trends in Rates of Death by Year

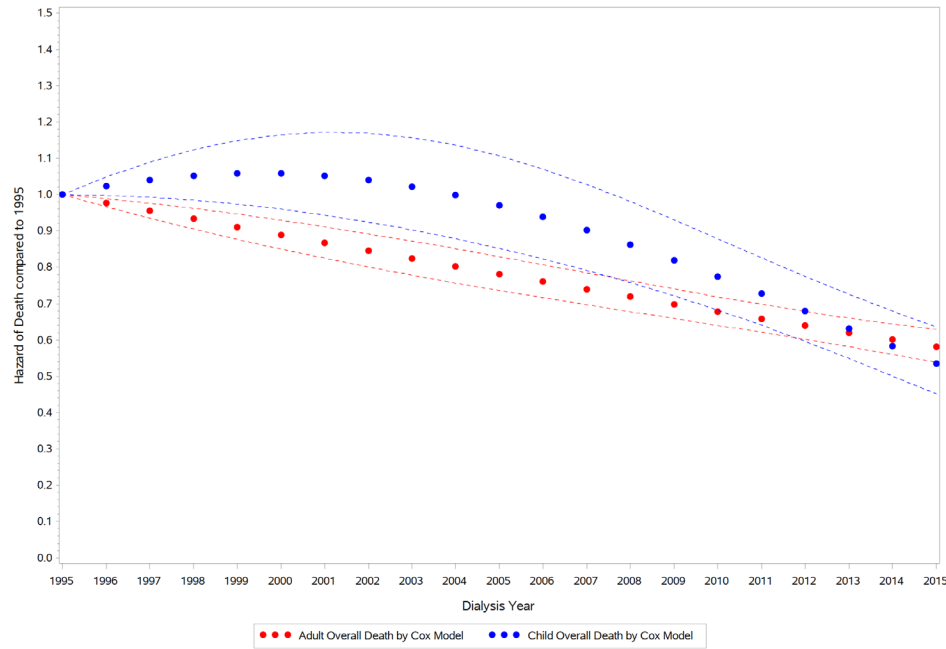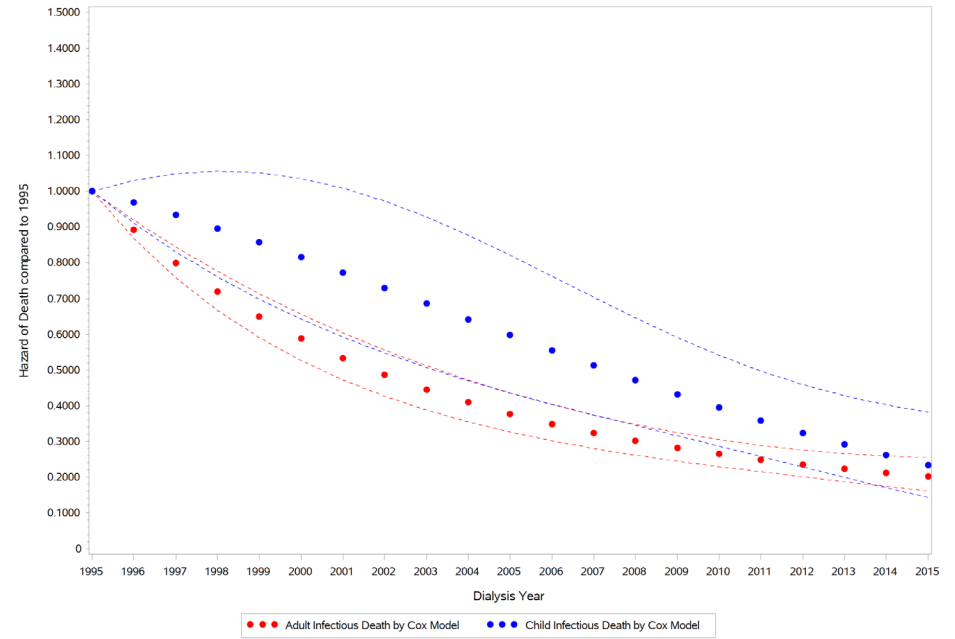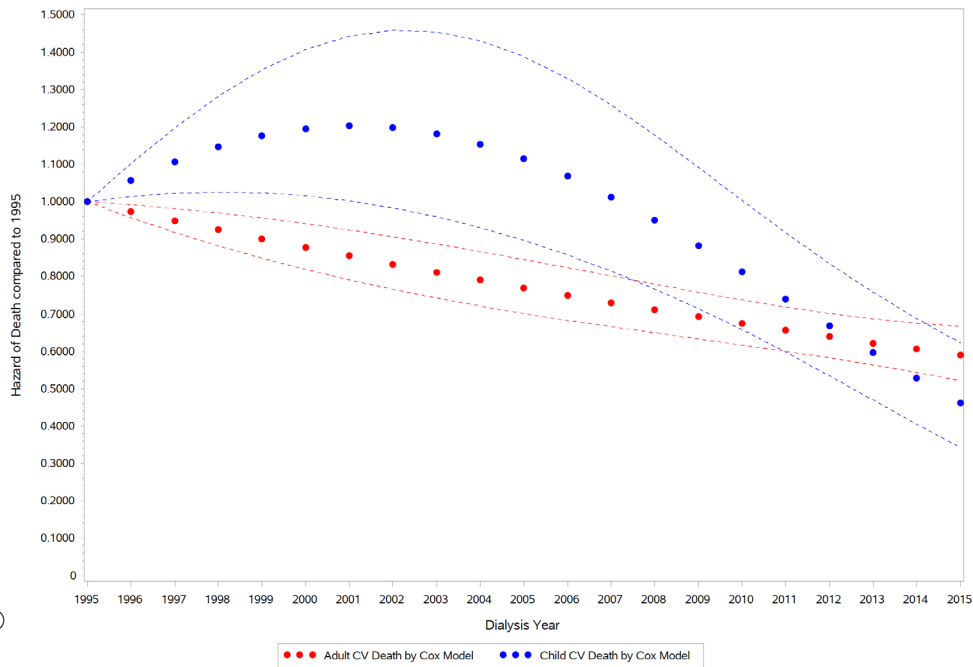

Supplement: jamanetwopen-e2016197-s001.pdf [file jamanetwopen-e2016197-s001.pdf]
